# Supplementary material for: Improved patient-reported outcomes in patients with psoriatic arthritis treated with risankizumab: analysis of the Phase 3 trial KEEPsAKE 2
Source: HighWire-hosted journal article supplement (doi:10.1136/rmdopen-2022-002286), 2022-06-01
Supplement: rmdopen-2022-002286supp001_data_supplement.pdf [file rmdopen-2022-002286supp001_data_supplement.pdf]

## SUPPLEMENTAL MATERIALS

### Improved patient-reported outcomes in patients with psoriatic arthritis treated with risankizumab: Analysis of the Phase 3 trial

#### KEEPSAKE 2

Andrew Ostor<sup>1</sup>, Ahmed M. Soliman<sup>2</sup>, Kim Papp<sup>3</sup>, Byron Padilla<sup>2</sup>, Zailong Wang<sup>2</sup>, Ann Eldred<sup>2</sup>, Kurt De Vlam<sup>4</sup>, Alan Kivitz<sup>5</sup>

<sup>1</sup>Cabrini Hospital, Monash University & Emeritus Research, Melbourne, Australia; <sup>2</sup>AbbVie Inc, North Chicago, IL, United States; <sup>3</sup>K

Papp Clinical Research and Probitry Medical Research, Waterloo, Ontario, Canada; <sup>4</sup>Department of Rheumatology, Universitair

Ziekenhuis Leuven, Leuven, Belgium; <sup>5</sup>Altoona Center for Clinical Research, Duncansville, PA, United States

#### Corresponding author:

Andrew Ostor, MD, MA, MB BS, FRACP, FRCP

Mailing address: Emeritus Research, Level 2, 1180 Toorak Rd, Camberwell, 3124, Australia

E-mail: [andrewostor@gmail.com](mailto:andrewostor@gmail.com)

0000-0002-7929-4827

**Supplemental Figure 1. Syndergram Visualization of Differences between Patients Receiving Risankizumab versus Placebo in SF-36 Domains at 24 Weeks**

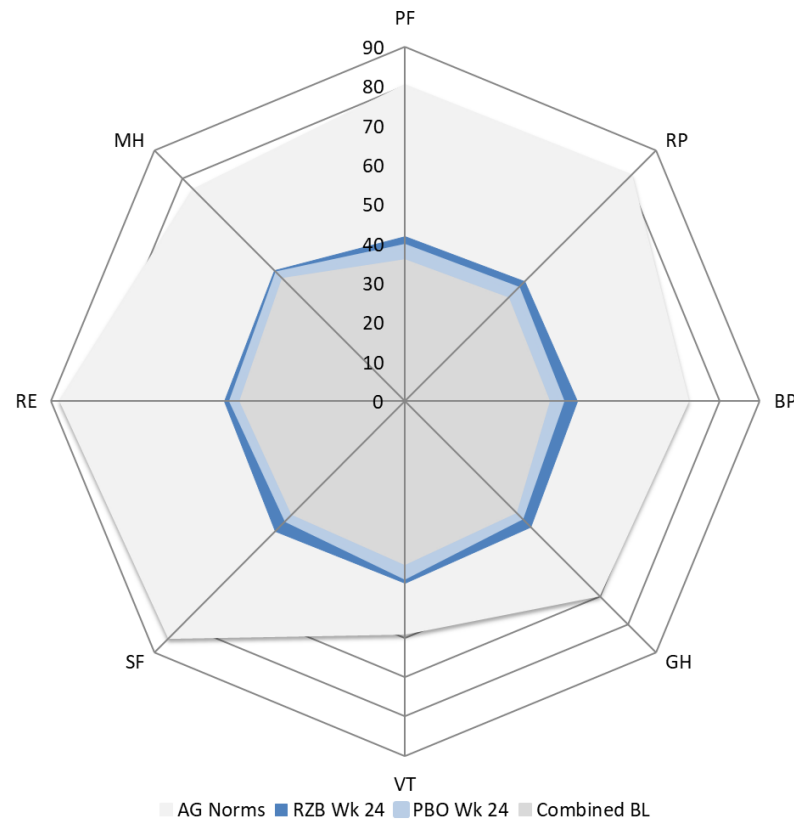

AG, age/gender adjusted normative values; BL, baseline; BP, bodily pain; GH, general health; MH, mental health; PBO, placebo; PF, physical health; RE, role emotional; RZB, risankizumab; RP, role physical; SF, social functioning; VT, vitality.

Supplementary Table S1. List of Investigators and Corresponding IEC/IRB

| Investigator Name                                   | Site Name/Post Office Address                                                                                              | Name and Address of IEC/IRB                                                                                                                                | Subinvestigators                                                                                                                                                                                                                                  |
|-----------------------------------------------------|----------------------------------------------------------------------------------------------------------------------------|------------------------------------------------------------------------------------------------------------------------------------------------------------|---------------------------------------------------------------------------------------------------------------------------------------------------------------------------------------------------------------------------------------------------|
| Aelion, Jacob                                       | West Tennessee Research Inst<br>Suite 400<br>369 N Parkway<br>JACKSON, Tennessee 38305-2883<br>United States of America    | <b>Central:</b><br>Quorum Institutional Review Board <sup>a</sup><br>1501 Fourth Ave<br>Suite 800<br>SEATTLE, Washington 98101<br>United States of America | Odhav, Satish K                                                                                                                                                                                                                                   |
| Aleman, Ricardo Garcia<br><br>(Site did not enroll) | Sweet Hope Research Specialty Inc<br>Suite 411<br>7100 W 20th Avenue<br>HIALEAH, Florida 33016<br>United States of America | <b>Central:</b><br>Quorum Institutional Review Board <sup>a</sup><br>1501 Fourth Ave<br>Suite 800<br>SEATTLE, Washington 98101<br>United States of America | Alvarez, Jose<br>Arcia, Marice<br>Becerra, Yamilady<br>Llop, Walter                                                                                                                                                                               |
| Ali, Shaikh Arif                                    | DM Clinical Research<br>Suite 2<br>13414 Medical Complex Dr<br>TOMBALL, Texas 77375<br>United States of America            | <b>Central:</b><br>Quorum Institutional Review Board <sup>a</sup><br>1501 Fourth Ave<br>Suite 800<br>SEATTLE, Washington 98101<br>United States of America | Irfan, Muhammad<br>Murray, Monica Christine<br>Peer, Adnan                                                                                                                                                                                        |
| Antolini, Christopher                               | Denver Arthritis Clinic<br>Suite 100<br>200 Spruce St<br>DENVER, Colorado 80230-7126<br>United States of America           | <b>Central:</b><br>Quorum Institutional Review Board <sup>a</sup><br>1501 Fourth Ave<br>Suite 800<br>SEATTLE, Washington 98101<br>United States of America | Barron, Gregory<br>Bray, Vance<br>Cave, Lisa<br>Gensler, Timothy<br>Glassman, Kenneth<br>Goldstein, Barbara<br>Hernandez, Theresa<br>Howard, Rennie<br>Malyak, Mark<br>Micciche, Laura<br>Murphy Jr., Stephen<br>Tyler, Kim<br>Whiddon, Annemarie |
| Antony, Anna<br><br>(Replaced Roberts, Lynden)      | Monash Health<br>246 Clayton Rd<br>CLAYTON, Victoria 3168                                                                  | <b>Central:</b><br>Monash Health Human Research<br>Ethics Committee                                                                                        | Ayoub, Sally                                                                                                                                                                                                                                      |

|                                                        |                                                                                                                                 |                                                                                                                                                                                                                                                                                                                                                                               |                                                                                            |
|--------------------------------------------------------|---------------------------------------------------------------------------------------------------------------------------------|-------------------------------------------------------------------------------------------------------------------------------------------------------------------------------------------------------------------------------------------------------------------------------------------------------------------------------------------------------------------------------|--------------------------------------------------------------------------------------------|
|                                                        | Australia                                                                                                                       | 246 Clayton Road<br>MELBOURNE, Victoria 3168<br>Australia                                                                                                                                                                                                                                                                                                                     |                                                                                            |
| Asnal, Cecilia                                         | DOM Centro de Reumatologia<br>1st floor<br>Ayacucho 1246<br>CIUDAD AUTONOMA BUENOS<br>AIRES, Buenos Aires C1111AAJ<br>Argentina | <b>Local:</b><br>Comite Independiente de Etica para<br>Ensayos en farmacologia Clinica<br>Fundacion de Estudios<br>Farmacologicos y de Medicamentos<br>Prof. Luis M. Zieher<br>Pte. J.E. Uriburu 774, 1st Floor<br>BUENOS AIRES, Ciudad Autonoma<br>de Buenos Aires C1027AAP<br>Argentina                                                                                     | Bohr, Analia<br>Perez, Silvana                                                             |
| Azevedo, Valderilio Feijó<br><br>(Site did not enroll) | EDUMED Educacao em Saude S/S L<br>Rua Bispo Dom Jose, 2495<br>CURITIBA, Parana 80440-080<br>Brazil                              | <b>Local:</b><br>Comite de Etica em Pesquisa em<br>Seres Humanos do HC/UFPR<br>Rua General Carneiro, 181, Alto da<br>XV<br>CURITIBA, Parana 80060-900<br>Brazil<br><b>Central:</b><br>Comissao Nacional de Etica em<br>Pesquisa (CONEP)<br>SRTVN, Quadra 701, Lote D, Edificio<br>PO 700, 3o Andar<br>Ala Norte, Via W 5 Norte, Asa Norte<br>BRASILIA/DF, 70719-040<br>Brazil | Mehl, Andrieli Caroline<br>Rossetto, Chayanne Natielle<br>Rubin de Celis, Ludmila Arrebola |

|                                                  |                                                                                                                                        |                                                                                                                                                                                                                    |                                                                                                                     |
|--------------------------------------------------|----------------------------------------------------------------------------------------------------------------------------------------|--------------------------------------------------------------------------------------------------------------------------------------------------------------------------------------------------------------------|---------------------------------------------------------------------------------------------------------------------|
| Back, Johan<br><br>(Site did not enroll)         | Uppsala University Hospital<br>Reumatologkliniken<br>Akademiska sjukhuset<br>UPPSALA, Uppsala lan 751 85<br>Sweden                     | <b>Central:</b><br>Regionala etikprövningsnämnden i<br>Stockholm<br>FE 289<br>STOCKHOLM, Stockholms lan 171 77<br>Sweden<br><b>Central:</b><br>Etikprovningensmyndigheten<br>Box 2110<br>UPPSALA, 750 02<br>Sweden | Adeli, Shamisa<br>Malliotis, Nikolas                                                                                |
| Baker, Milton<br><br>(Site did not enroll)       | Percura Clinical Research, Ltd<br>305 1120 Yates St<br>VICTORIA, British Columbia V8V 3M9<br>Canada                                    | <b>Central:</b><br>Advarra<br>372 Hollandview Trail<br>Suite 300<br>AURORA, Ontario LG4 0A5<br>Canada                                                                                                              | Shaw, David                                                                                                         |
| Balbir-Gurman, Alexandra                         | Rambam Medical Health Care<br>Campus<br>Rheumatology Department<br>8 Haaliya Hashniya St.<br>HAIFA, 3109601<br>Israel                  | <b>Local:</b><br>Rambam Medical Health Care<br>Campus<br>8 Haaliya Hashniya street<br>HAIFA, 3109601<br>Israel                                                                                                     | Braun-Moscovici, Yolanda<br>Giryas, Sami<br>Moskovis, Doron<br>Rozin, Alexander<br>Tavor, Yonit<br>Toledano, Kohava |
| Balog, Attila                                    | Szent-Gyorgyi Albert Klinikai Kozpont<br>Reumatologiai es Immunologiai<br>klinika Kálvária sugárút 57<br>SZEGED, Csongrad 6725 Hungary | <b>Central:</b><br>Egeszseguegyi Tudomanyos Tanacs<br>Klinikai Farmakologiai Etikai<br>Bizottsag<br>Alkotmany u. 25<br>BUDAPEST, 1025<br>Hungary                                                                   | Bocskai, Marta<br>Burcsar, Szilard Kovacs, Laszlo                                                                   |
| Baraliakos, Xenofon<br><br>(Site did not enroll) | Rheumazentrum Ruhrgebiet<br>Claudiusstr. 45<br>HERNE, 44649<br>Germany                                                                 | <b>Central:</b><br>Ethik-Kommission der Medizinischen<br>Fakultaet der Ruhr- Universität<br>Bochum<br>Gesundheitscampus 33<br>BOCHUM, 44801<br>Germany                                                             | Andreica, Ioana<br>Kiefer, David Kiltz, Uta Mintrop,<br>Bernhard Tsiami, Styliani                                   |

|                                         |                                                                                                                                                       |                                                                                                                                                                                                                                                                                            |                                                                                                                                              |
|-----------------------------------------|-------------------------------------------------------------------------------------------------------------------------------------------------------|--------------------------------------------------------------------------------------------------------------------------------------------------------------------------------------------------------------------------------------------------------------------------------------------|----------------------------------------------------------------------------------------------------------------------------------------------|
| Barcelos, Filipe                        | Instituto Portugues De Reumatologia<br>Rua da Beneficencia, n.7<br>LISBOA, 1050-034<br>Portugal                                                       | <b>Central:</b><br>CEIC - Comissão de Ética para a<br>Investigação Clínica<br>Parque da Saude de Lisboa, Av. do<br>Brasil, 53 - Pav. 17-A<br>LISBON, Lisboa 1749-004<br>Portugal                                                                                                           | Madeira, Nathalie<br>Micaelo, Manuela<br>Vaz Patto, Jose                                                                                     |
| Basu, Dhiman                            | PCCR Soluton<br>5009 Heritage Ave<br>COLLEYVILLE, Texas 76034<br>United States of America                                                             | <b>Central:</b><br>Quorum Institutional Review Board <sup>a</sup><br>1501 Fourth Ave<br>Suite 800<br>SEATTLE, Washington 98101<br>United States of America                                                                                                                                 | Reddy, Himabindu<br>Syeda, Uzma                                                                                                              |
| Behrens, Frank<br>(Site did not enroll) | Cent fur Innovative Diagnostik and<br>Therapeutics<br>Rheumatologie und Immunologie<br>Haus 33B<br>Theodor-Stern-Kai 7<br>FRANKFURT, 60590<br>Germany | <b>Central:</b><br>Ethik-Kommission der Medizinischen<br>Fakultaet der Ruhr- Universität<br>Bochum<br>Gesundheitscampus 33<br>BOCHUM, 44801<br>Germany                                                                                                                                     | Koehm, Michaela                                                                                                                              |
| Berman, Horacio                         | Centro Medico Privado/Reuma<br>Lavalle 506<br>SAN MIGUEL DE TUCUMAN,<br>Tucuman CP4000 Argentina                                                      | <b>Local:</b><br>Comite Independiente de Etica para<br>Ensayos en farmacologia Clinica<br>Fundacion de Estudios<br>Farmacologicos y de<br>Medicamentos, Prof. Luis M. Zieher<br>Pte. J.E. Uriburu 774, 1st Floor<br>BUENOS AIRES, Ciudad Autonoma<br>de Buenos Aires C1027AAP<br>Argentina | Arquez, Gustavo<br>Berman, Alberto Cardozo, Maria<br>Gabriela<br>Destefani Villafane, Nicolas Javier<br>Huerta, Elena María<br>Ruiz, Natalia |
| Birbara, Charles                        | Clinical Pharmacology Study Gr<br>25 Oak Ave<br>WORCESTER, Massachusetts 01605<br>United States of America                                            | <b>Central:</b><br>Quorum Institutional Review Board <sup>a</sup><br>1501 Fourth Ave<br>Suite 800<br>SEATTLE, Washington 98101<br>United States of America                                                                                                                                 | Kumar, Sheela                                                                                                                                |

|                                          |                                                                                                                                                                                                               |                                                                                                                                                            |                                                                                                                                                                              |
|------------------------------------------|---------------------------------------------------------------------------------------------------------------------------------------------------------------------------------------------------------------|------------------------------------------------------------------------------------------------------------------------------------------------------------|------------------------------------------------------------------------------------------------------------------------------------------------------------------------------|
| Blanco Alonso, Ricardo                   | Hospital Unversitario Marques de Valdecilla<br>Servicio de Reumatologia<br>Edif. Valdecilla Sur. Edificio consultas / 2ª planta. Pasillo 1<br>Avda. de Valdecilla, s/n<br>SANTANDER, Cantabria 39008<br>Spain | <b>Central:</b><br>CEIC Hospital Clinico San Carlos Area 7<br>C/ Profesor Martin Lagos, s/n<br>Puerta G Planta 4 Norte<br>MADRID, 28040<br>Spain           | Ayerbe, Ines<br>Calvo del Rio, Vanesa Loricera, Javier<br>Martinez Dubois, Cristina                                                                                          |
| Blanco, Francisco                        | Complejo Hospitalario Universitario A Coruña - CHUAC<br>Servicio de Reumatologia (consultas externas)<br>Planta 6<br>C/ Xubias de Arriba, 84<br>A CORUÑA, A Coruna 15006<br>Spain                             | <b>Central:</b><br>CEIC Hospital Clinico San Carlos Area 7<br>C/ Profesor Martin Lagos, s/n<br>Puerta G Planta 4 Norte<br>MADRID, 280410<br>Spain          | Acasuso Pardo de Vera, Belen<br>Fernandez Lopez, Jesus Carlos Oreiro<br>Villar, Natividad<br>Pinto Rasende, Jose Antonio Raga<br>Sivira, Ana Cecilia Varela García,<br>María |
| Bode, Barbara<br>(Site did not enroll)   | Southern Arizona VA Health Care System<br>3601 S 6th Ave (11-PUL)<br>TUCSON, Arizona 85723-0001<br>United States of America                                                                                   | <b>Local:</b><br>Southern Arizona VA Health Care System IRB<br>3601 S. 6th Avenue (11-151)<br>TUCSON, Arizona 85723<br>United States of America            | Pender, Anita N Wilhelm, William                                                                                                                                             |
| Bos, Reinhard<br>(Site did not enroll)   | Medisch Centrum Leeuwarden<br>Henri Dunantweg 2<br>LEEUWARDEN, 8934 AD<br>Netherlands                                                                                                                         | <b>Central:</b><br>METC Erasmus MC<br>Postbus 2040<br>ROTTERDAM, Zuid-Holland 3000 CA<br>Netherlands                                                       | Reimann, Floor                                                                                                                                                               |
| Bounas, Andreas<br>(Site did not enroll) | Olympion General Clinic SA<br>Internal Medicine Department Volou & Milihou<br>PATRA, Peloponnisos 26443 Greece                                                                                                | <b>Central:</b><br>National Organisation of Medicines (E.O.F.) and National Ethics Committee (E.E.D.)<br>Mesogion 284<br>CHOLARGOS ATHENS, 15562<br>Greece | None                                                                                                                                                                         |

|                                                                     |                                                                                                                                                       |                                                                                                                                                                                                                 |                                                                                                                                                                                                  |
|---------------------------------------------------------------------|-------------------------------------------------------------------------------------------------------------------------------------------------------|-----------------------------------------------------------------------------------------------------------------------------------------------------------------------------------------------------------------|--------------------------------------------------------------------------------------------------------------------------------------------------------------------------------------------------|
| Brzezicki, Jan                                                      | Centrum Kliniczno-Badawcze<br>ul. Studzienna 35-36/A ELBLAG, 82-300<br>Poland                                                                         | <b>Central:</b><br>Komisja Bioetyczna przy Okregowej<br>Izbie Lekarskiej w Krakowie<br>Ul. Krupnicza 11A KRAKOW, 31-123<br>Poland                                                                               | Barber, Dorota<br>Bielewicz-Zielinska, Agnieszka<br>Gornikiewicz-Brzezicka, Bozena<br>Kwiatkowska, Danuta Soboczynska,<br>Alicja<br>Sosnowska, Wioletta Joanna<br>Drabiszczak-Piatkowska, Janina |
| Budd III, John                                                      | Clayton Medical Associates, P.C.<br>6400 Clayton Road, Suite 110 SAINT<br>LOUIS, Missouri 63117<br>United States of America                           | <b>Central:</b><br>Quorum Institutional Review Board <sup>a</sup><br>1501 Fourth Ave<br>Suite 800<br>SEATTLE, Washington 98101<br>United States of America                                                      | Bernhart, Beatrice A.<br>Hessel, Michael<br>Ronholm, Chad<br>Wilmsmeyer, Sarah M.                                                                                                                |
| Carrio, Judith                                                      | Centro de Enfermedades del Hígado<br>y Aparato Digestivo<br>Laprida 970<br>ROSARIO, Santa Fe CP2000<br>Argentina                                      | <b>Local:</b><br>Comite de Etica Dr. Claude Bernard<br>San Lorenzo 2555<br>ROSARIO, Santa Fe S2000KPG<br>Argentina                                                                                              | Lima, Nora Beatriz Tanno, Mario<br>Enrique                                                                                                                                                       |
| Carter, John                                                        | University of South Florida<br>13330 USF Laurel Dr, MDC 81<br>TAMPA, Florida 33612<br>United States of America                                        | <b>Central:</b><br>Quorum Institutional Review Board <sup>a</sup><br>1501 Fourth Ave<br>Suite 800<br>SEATTLE, Washington 98101<br>United States of America                                                      | Figueroa Sierra, Marielys<br>Lin, Yih Chang                                                                                                                                                      |
| Catrina, Anca<br><br>(Replaced Lampa, Jon)<br>(Site did not enroll) | PO Gastro, Hud, Reuma, Tema I & I<br>Karolinska universitetssjukhuset<br>Klinisk Forskningsenhet , A7:01<br>STOCKHOLM, Stockholms lan 17176<br>Sweden | <b>Central:</b><br>Regionala etikprövningsnämnden i<br>Stockholm<br>FE 289<br>STOCKHOLM, Stockholms lan 171 77<br>Sweden<br><b>Central:</b><br>Etikprovningmyndigheten<br>Box 2110<br>UPPSALA, 750 02<br>Sweden | Altawil, Reem<br>Chatzidionysiou, Aikaterini                                                                                                                                                     |
| Chindalore, Vishala                                                 | Pinnacle Research Group                                                                                                                               | <b>Central:</b>                                                                                                                                                                                                 | Atchley, Amanda M                                                                                                                                                                                |



|                                       |                                                                                                                                           |                                                                                                                                                                                  |                                                                                                                                                                            |
|---------------------------------------|-------------------------------------------------------------------------------------------------------------------------------------------|----------------------------------------------------------------------------------------------------------------------------------------------------------------------------------|----------------------------------------------------------------------------------------------------------------------------------------------------------------------------|
|                                       | 321 East 10th St<br>ANNISTON, Alabama 36207<br>United States of America                                                                   | Quorum Institutional Review Board <sup>a</sup><br>1501 Fourth Ave<br>Suite 800<br>SEATTLE, Washington 98101<br>United States of America                                          | Bolt, April B<br>Ready, James M                                                                                                                                            |
| Chiu, Yee Ho<br>(Site did not enroll) | Arrowe Park Hospital<br>Rheumatology department<br>2nd Floor<br>Arrowe Park Rd<br>WIRRAL, CH49 5PE<br>United Kingdom                      | <b>Central:</b><br>London - Brighton and Sussex REC<br>Eastern Road<br>Audrey Emerton Building<br>BRIGHTON, BN2 0AE<br>United Kingdom                                            | George, Emmanuel                                                                                                                                                           |
| Codding, Christine                    | Health Research of Oklahoma<br>Suite 409<br>1211 North Shartel Ave<br>OKLAHOMA CITY, Oklahoma 73103<br>United States of America           | <b>Central:</b><br>Quorum Institutional Review Board <sup>a</sup><br>1501 Fourth Ave<br>Suite 800<br>SEATTLE, Washington 98101<br>United States of America                       | Gillan, Muhammad, Monem<br>Quisenberry, Susan Loraine                                                                                                                      |
| Collins, Robert                       | Nashville Arthritis and<br>Rheumatology<br>Suite 101<br>2001 Charlotte Ave<br>NASHVILLE, Tennessee 37203-2032<br>United States of America | <b>Central:</b><br>Quorum Institutional Review Board <sup>a</sup><br>1501 Fourth Ave<br>Suite 800<br>SEATTLE, Washington 98101<br>United States of America                       | Franklin, Amanda<br>McCrary, Caroline<br>Sonnier, Cora                                                                                                                     |
| Costa, Jose                           | Unidade Local De Saude Do Alto<br>Minho Largo Conde de Bertandos<br>PONTE DE LIMA, 4990-041<br>Portugal                                   | <b>Central:</b><br>CEIC - Comissão de Ética para a<br>Investigação Clínica<br>Parque da Saude de Lisboa, Av. do<br>Brasil, 53 - Pav. 17-A<br>LISBON, Lisboa 1749-004<br>Portugal | Afonso, Maria do Carmo Alcino,<br>Sergio<br>Almeida, Diogo Azevedo, Soraia<br>Faria, Daniela Guimarães, Francisca<br>Peixoto, Daniela Rodrigues, Joana<br>Teixeira, Filipa |
| De Vlam, Kurt                         | UZ Leuven<br>Herestraat 49<br>LEUVEN, 3000<br>Belgium                                                                                     | <b>Central:</b><br>Commissie voor Medische Ethiek<br>Universitair Ziekenhuis Gent<br>C. Heymanslaan 10                                                                           | Neerinckx, Barbara<br>Van Mechelen, Margot                                                                                                                                 |

|                                             |                                                                                                                                          |                                                                                                                                                                                                                                                                                                                                  |                                                    |
|---------------------------------------------|------------------------------------------------------------------------------------------------------------------------------------------|----------------------------------------------------------------------------------------------------------------------------------------------------------------------------------------------------------------------------------------------------------------------------------------------------------------------------------|----------------------------------------------------|
|                                             |                                                                                                                                          | GENT, Oost-Vlaanderen 9000<br>Belgium<br><b>Local:</b><br>Ethische Commissie Onderzoek<br>UZ/KU Leuven<br>Administratief Gebouw - grijze pij<br>Herestraat 49<br>LEUVEN, Vlaams-Brabant 3000<br>Belgium                                                                                                                          |                                                    |
| Desir, Deborah<br><br>(Site did not enroll) | Arthritis & Osteoporosis Center, P.C.<br>3018 Dixwell Avenue<br>HAMDEN, Connecticut 06518<br>United States of America                    | <b>Local:</b><br>Quorum Institutional Review Board <sup>a</sup><br><br>1501 Fourth Ave<br>Suite 800<br>SEATTLE, Washington 98101<br>United States of America                                                                                                                                                                     | Gordon-Dole, Sonia M.                              |
| Diab, Isam                                  | Paramount Medical Research Con<br>Phase II, Suite #102B<br>18660 Bagley Rd<br>MIDDLEBURG HEIGHTS, Ohio 44130<br>United States of America | <b>Central:</b><br>Quorum Institutional Review Board <sup>a</sup><br><br>1501 Fourth Ave<br>Suite 800<br>SEATTLE, Washington 98101<br>United States of America                                                                                                                                                                   | Gendics, Cindy<br>Ignat, Gheorghe<br>Titsch, Ellen |
| Diegel, Roger                               | Glacier View Research Institut<br>150 Commons Way<br>KALISPELL, Montana 59901-1910<br>United States of America                           | <b>Central:</b><br>Quorum Institutional Review Board <sup>a</sup><br><br>1501 Fourth Ave<br>Suite 800<br>SEATTLE, Washington 98101<br>United States of America<br><b>Local:</b><br>Kalispell Regional Medical Center<br>Institutional Review Board<br>310 Sunnyview Lane<br>KALISPELL, Montana 59901<br>United States of America | Brewer, Rachel<br>VanBelois, Bernadette            |
| Dorai Raj, Annamma                          | The Canberra Hospital                                                                                                                    | <b>Central:</b>                                                                                                                                                                                                                                                                                                                  | Pentony, Peta                                      |

|                                         |                                                                                                                                                                 |                                                                                                                                                                                                                                                                              |                                                                                                |
|-----------------------------------------|-----------------------------------------------------------------------------------------------------------------------------------------------------------------|------------------------------------------------------------------------------------------------------------------------------------------------------------------------------------------------------------------------------------------------------------------------------|------------------------------------------------------------------------------------------------|
|                                         | Clinical Trials Unit<br>Building 1, Level 2<br>Yamba Drive<br>GARRAN, Australian Capital Territory<br>2605<br>Australia                                         | Monash Health Human Research<br>Ethics Committee<br>246 Clayton Road<br>MELBOURNE, Victoria 3168<br>Australia<br><b>Local:</b><br>Canberra Hospital<br>Research, Ethics and Governance<br>Office<br>Yamba Drive<br>GARRAN, Australian Capital Territory<br>2605<br>Australia | Perera, Chandima<br>Tsai, Ted<br>Tymms, Kathleen                                               |
| Drescher, Edit                          | Vital Medical Center Orvosi-es<br>Fogaszati Kozpont<br>József Attila utca 17 VESZPRÉM,<br>8200<br>Hungary                                                       | <b>Central:</b><br>Egeszseguyi Tudomanyos Tanacs<br>Klinikai Farmakologiai Etikai<br>Bizottsag<br>Alkotmany utca 25<br>BUDAPEST, Budapest 1025<br>Hungary                                                                                                                    | Kiss, Csaba Kocsy, Timea                                                                       |
| Everding, Andrea                        | Hamburger Rheuma<br>Forschungszentrum II im MVZ<br>Rheumatologie und<br>Autoimmunmedizin<br>Hamburg GmbH 4.OG<br>Monckebergstr. 27<br>HAMBURG, 20095<br>Germany | <b>Central:</b><br>Ethik-Kommission der Medizinischen<br>Fakultaet der Ruhr- Universität<br>Bochum<br>Gesundheitscampus 33<br>BOCHUM, Nordrhein-Westfalen<br>44801<br>Germany                                                                                                | Kull, Roswitha Mehrwald, Marret<br>Peldschus, Meike Schaposchnikow,<br>Marina Steigemann, Iska |
| Fazekas, Katalin                        | CRU Hungary Kft.<br><br>Csabai kapu 9-11<br>MISKOLC, 3529<br>Hungary                                                                                            | <b>Central:</b><br>Egeszseguyi Tudomanyos Tanacs<br>Klinikai Farmakologiai Etikai<br>Bizottsag<br>Alkotmany utca 25<br>BUDAPEST, Budapest 1025<br>Hungary                                                                                                                    | Kardos, Zsofia                                                                                 |
| Fedkov, Dmytro<br>(Site did not enroll) | Medical Centre of Medical Clinic<br>Blagomed LLC                                                                                                                | <b>Local:</b><br>Local Ethics Commission of Medical                                                                                                                                                                                                                          | Krasnytska, Kateryna Pugach,<br>Mykhailo Skrypchenko, Oksana V.                                |

|                                               |                                                                                                                             |                                                                                                                                                                  |                                                                                                                                                                                         |
|-----------------------------------------------|-----------------------------------------------------------------------------------------------------------------------------|------------------------------------------------------------------------------------------------------------------------------------------------------------------|-----------------------------------------------------------------------------------------------------------------------------------------------------------------------------------------|
|                                               | Esplanadna str. 20, office 417<br>KYIV, Kyiv 01601<br>Ukraine                                                               | Centre of Medical Clinic Blagomed,<br>LLC<br>20, Esplanadna str., office 417<br>KYIV, 01601<br>Ukraine                                                           |                                                                                                                                                                                         |
| Fels, Edward<br><br>(Site did not enroll)     | Rheumatology Associates, PA<br>51 Sewall St<br>PORTLAND, Maine 04102<br>United States of America                            | <b>Central:</b><br>Quorum Institutional Review Board <sup>a</sup><br><br>1501 Fourth Ave<br>Suite 800<br>SEATTLE, Washington 98101<br>United States of America   | Daikh, Brian E.<br>Gartner-Fanburg, Stephanie D.<br>Keroack, Brian J                                                                                                                    |
| Fortin, Isabelle<br><br>(Site did not enroll) | Ctr. de Rheum de l'est du QC<br>bureau 103<br>176 Ave Rouleau<br>RIMOUSKI, Quebec G5L 8W1<br>Canada                         | <b>Central:</b><br>Advarra<br>372 Hollandview Trail<br>Suite 300<br>AURORA, Ontario LG4 0A5<br>Canada                                                            | None                                                                                                                                                                                    |
| Fracassi, Elena                               | c/o Policlinico G. B. Rossi<br><br>AOUI di Verona – UOC di<br>Reumatologia P.le Ludovico Scuro 10<br>VERONA, 37126<br>Italy | <b>Local:</b><br>Comitato Etico per la<br>Sperimentazione Clinica delle<br>Province di Verona e Rovigo<br>Piazzale A. Stefani 1 VERONA,<br>Veneto 37126<br>Italy | Piazza, Ilaria<br><br>Zambarda, Clara                                                                                                                                                   |
| Freeman, Pamela                               | Rheum Assoc of Central FL<br>Suite 30<br>3160 Southgate Commerce Blvd<br>ORLANDO, Florida 32806<br>United States of America | <b>Central:</b><br>Advarra<br>6940 Columbia Gateway Drive<br>Suite 110<br>COLUMBIA, Maryland 21046<br>United States of America                                   | Cano, Haydee<br>Frisby, Alicia R.<br>Hasselbring, Caryn G.<br>Mellenberndt, Tina<br>Payne, Christina M.<br>Raturi, Rita<br>Santiago, Ivette<br>Summers, Laura B.<br>Vernacchio, Barbara |
| Gabrielli, Armando                            | AOU Ospedali Riuniti - G.M. Lancisi,<br>G. Salesi<br>CLINICA MEDICA - Dipartimento di<br>Medicina                           | <b>Local:</b><br>Comitato Etico Regionale Marche<br>(C.E.R.M.)<br>Via Conca, 71                                                                                  | Benfaremo, Devis Luchetti, Michele<br>M Manfredi, Lucia Marconi,<br>Valentina Moroncini, Gianluca Paci,                                                                                 |

|                                                  |                                                                                                                                                 |                                                                                                                                                                |                                                                                                                                            |
|--------------------------------------------------|-------------------------------------------------------------------------------------------------------------------------------------------------|----------------------------------------------------------------------------------------------------------------------------------------------------------------|--------------------------------------------------------------------------------------------------------------------------------------------|
|                                                  | Via conca, 71<br>TORRETTE DI ANCONA, 60126<br>Italy                                                                                             | TOURETTE DI ANCONA, 60126<br>Italy                                                                                                                             | Valentino<br>Perini, Lucia                                                                                                                 |
| Gaylis, Norman                                   | Arthritis & Rheumatic Disease<br>Specialties<br>21097 Northeast 27th Court Suite<br>#200<br>AVENTURA, Florida 33180<br>United States of America | <b>Central:</b><br>Quorum Institutional Review Board <sup>a</sup><br><br>1501 Fourth Ave<br>Suite 800<br>SEATTLE, Washington 98101<br>United States of America | Keegan Strosser, Julie Yglesias,<br>Ronald                                                                                                 |
| Gladstein, Geoffrey<br><br>(Site did not enroll) | New England Research Associates,<br>LLC<br>Suite 3<br>4641 Main St<br>BRIDGEPORT, Connecticut 06606-<br>1827<br>United States of America        | <b>Central:</b><br>Quorum Institutional Review Board <sup>a</sup><br><br>1501 Fourth Ave<br>Suite 800<br>SEATTLE, Washington 98101<br>United States of America | Brandon, Jennifer<br><br>Brew, Patrick<br>Brothers, Laura<br><br>Moses, Stephen J<br>Moss, Jeremy Ethan<br>Rau, Gregory J<br>Seara, Milena |
| Gnylorybov, Andriy<br><br>(Site did not enroll)  | Medical Center of LLC Revmocentr<br>Department of Clinical Research<br>5, Spaska Str.<br>KYIV, 04070<br>Ukraine                                 | <b>Local:</b><br>Local Ethics Commission of LLC<br>Revmocentr<br>5, Spaska Street<br>KYIV, 04070<br>Ukraine                                                    | Melokhina, Valeriia<br>Stanytska, Maryna B.                                                                                                |
| Gonzalez-Paoli, Julio                            | BayCare Medical Group<br>Suite 2E<br>620 10th St N<br>SAINT PETERSBURG, Florida 33705-<br>1407<br>United States of America                      | <b>Central:</b><br>Advarra<br>6940 Columbia Gateway Drive<br>Suite 110<br>COLUMBIA, Maryland 21046<br>United States of America                                 | Bell, Eileen C.<br>Lugo Ruiz, Sonialy<br>Peddle, Jennifer Elizabeth<br>Richert, Nadine<br>Torres, Arnaldo                                  |
| Goupille, Philippe                               | CHRU Tours - Hopital Trousseau<br>Service de Rhumatologie<br>Avenue de la Republique<br>CHAMBRAY-LES-TOURS, 37170<br>France                     | <b>Central:</b><br>Sud Mediterranee V<br>4 avenue Reine Victoria - CS 91179<br>Hopital de Cimiez - Pavillon Victoria -<br>Rez-de-Chaussee                      | Cattelain, Elsa<br>Chu Miow Lin, Delphine<br>Griffoul, Isabelle<br>Mammou, Saloua                                                          |

|                                                 |                                                                                                                                                                 |                                                                                                                                                            |                                                            |
|-------------------------------------------------|-----------------------------------------------------------------------------------------------------------------------------------------------------------------|------------------------------------------------------------------------------------------------------------------------------------------------------------|------------------------------------------------------------|
|                                                 |                                                                                                                                                                 | NICE CEDEX 1, Alpes-Maritimes<br>06003<br>France                                                                                                           |                                                            |
| Grewal, Suneet                                  | East Bay Rheumatology Medical<br>13851 East14th St<br>Suite 301<br>SAN LEANDRO, California 94578<br>United States of America                                    | <b>Central:</b><br>Quorum Institutional Review Board <sup>a</sup><br>1501 Fourth Ave<br>Suite 800<br>SEATTLE, Washington 98101<br>United States of America | Neuwelt, C Michael                                         |
| Griep, Eduard<br>(Site did not enroll)          | Antonius Ziekenhuis Sneek<br>Bolswarderbaan 1<br>SNEEK, Fryslan 8601 ZK<br>Netherlands                                                                          | <b>Central:</b><br>METC Erasmus MC<br>Postbus 2040<br>ROTTERDAM, Zuid-Holland 3000 CA<br>Netherland                                                        | Griep-Wentink, Joanna Rosalia Maria                        |
| Halpert, Elias                                  | W. Broward Rheum Assoc Inc.<br>Suite 300<br>7431 North University Dr<br>TAMARAC, Florida 33321<br>United States of America                                      | <b>Central:</b><br>Quorum Institutional Review Board <sup>a</sup><br>1501 Fourth Ave<br>Suite 800<br>SEATTLE, Washington 98101<br>United States of America | Alberts, Alan R.<br>Kimmel, Steven C.<br>Stone, Kevin E.   |
| Hatti, Kalpita<br>(Site did not enroll)         | Kadlec Clinic Rheumatology<br>6710 West Okanogan Pl<br>KENNEWICK, Washington 99336<br>United States of America                                                  | <b>Central:</b><br>Quorum Institutional Review Board <sup>a</sup><br>1501 Fourth Ave<br>Suite 800<br>SEATTLE, Washington 98101<br>United States of America | Hart, Jeannette<br>Salvos, Timothy<br>Schieffelbein, Mandy |
| Hauge, Ellen-Margrethe<br>(Site did not enroll) | Aarhus Universitetshospital<br>Klinik for Led- og<br>Bindevævssygdomme<br>Indgang E<br>Palle Juul-Jensens Boulevard 59<br>AARHUS N, Midtjylland 8200<br>Denmark | <b>Central:</b><br>Videnskabsetisk Komite Region<br>Midtjylland<br>Skottenborgvej 26<br>VIBORG, 8800<br>Denmark                                            | Blavnsfeldt, Anne-Birgitte<br><br>Svenningsen, Jonas       |
| Heuer, Marvin                                   | HEUERMD RESEARCH, LLC                                                                                                                                           | <b>Central:</b>                                                                                                                                            | Martorell, Edgar                                           |

|                                          |                                                                                                                                                        |                                                                                                                                                                |                                                                                                                                                                                              |
|------------------------------------------|--------------------------------------------------------------------------------------------------------------------------------------------------------|----------------------------------------------------------------------------------------------------------------------------------------------------------------|----------------------------------------------------------------------------------------------------------------------------------------------------------------------------------------------|
|                                          | Suite 104<br>6001 VINELAND Rd<br>ORLANDO, Florida 32819<br>United States of America                                                                    | Quorum Institutional Review Board <sup>a</sup><br><br>1501 Fourth Ave<br>Suite 800<br>SEATTLE, Washington 98101<br>United States of America                    |                                                                                                                                                                                              |
| Ho, Gerald                               | Arthritis & Osteo Medical Ctr<br>Suite 25<br>5451 La Palma Ave<br>LA PALMA, California 90623<br>United States of America                               | <b>Central:</b><br>Quorum Institutional Review Board <sup>a</sup><br><br>1501 Fourth Ave<br>Suite 800<br>SEATTLE, Washington 98101<br>United States of America | Liu, Lily                                                                                                                                                                                    |
| Ho, Pauline<br><br>(Site did not enroll) | Manchester Royal Infirmary<br>The Kellgren Centre For<br>Rheumatology<br>Oxford Road<br>MANCHESTER, M13 9WL<br>United Kingdom                          | <b>Central:</b><br>London - Brighton and Sussex REC<br><br>Eastern Road<br>Audrey Emerton Building<br>BRIGHTON, BN2 0AE<br>United Kingdom                      | McCarthy, Eoghan                                                                                                                                                                             |
| Hollander, Adrienne                      | Arthritis Rheumatic Back Disease<br>Associates. P.A.<br>Bldg. 800 Ste 115<br>2301 Evesham Rd<br>VOORHEES, New Jersey 08043<br>United States of America | <b>Central:</b><br>Quorum Institutional Review Board <sup>a</sup><br><br>1501 Fourth Ave<br>Suite 800<br>SEATTLE, Washington 98101<br>United States of America | Abraham, Shawn G.<br>Eisenberger, Nancy Evangelisto, Amy<br>M.<br>Patel, Ruchika<br>Schuster, Michael C.<br>Silver, Arielle S.<br>Solomon, Sheldon D.<br>Sundhar, Joshua B.<br>Weeks, Alicia |
| Hozman, Robert                           | Clinic of Robert Hozman/Clinical<br>Investigation Specialists<br>Suite 111<br>4709 Golf Rd<br>SKOKIE, Illinois 60076<br>United States of America       | <b>Central:</b><br>Quorum Institutional Review Board <sup>a</sup><br><br>1501 Fourth Ave<br>Suite 800<br>SEATTLE, Washington 98101<br>United States of America | Agaiby, Eva M. Agaiby, John M.                                                                                                                                                               |
| Joos, Rik                                | ZNA - Jan Palfijn                                                                                                                                      | <b>Central:</b>                                                                                                                                                | Aerts, Nicolaas                                                                                                                                                                              |

|                       |                                                                                                                                                                                     |                                                                                                                                                                                                                                                                                                        |                                                                                                                   |
|-----------------------|-------------------------------------------------------------------------------------------------------------------------------------------------------------------------------------|--------------------------------------------------------------------------------------------------------------------------------------------------------------------------------------------------------------------------------------------------------------------------------------------------------|-------------------------------------------------------------------------------------------------------------------|
| (Site did not enroll) | Rheumatology<br>Lange Bremstraat 70<br>MERKSEM, Antwerpen 2170<br>Belgium                                                                                                           | Commissie voor Medische Ethiek<br>Universitair Ziekenhuis Gent<br>C. Heymanslaan 10<br>GENT, Oost-Vlaanderen 9000<br>Belgium<br><b>Local:</b><br>Commissie voor Medische Ethiek<br>ZNA<br>Lindendreef 1<br>ZNA Koningin Paola Kinderziekenhuis<br>P4, route 34<br>ANTWERPEN, Antwerpen 2020<br>Belgium | Geens, Elke<br>Ishchenko, Alla<br>Vanderstukken, Joke<br>Wittoek, Ruth Eliane                                     |
| Joven, Beatriz        | Hospital Universitario 12 de Octubre<br>Despacho Reumatología<br>Centro Actividades Ambulatorias, 2ª<br>planta bloque C<br>Avenida de Cordoba, s/n<br>MADRID, Madrid 28041<br>Spain | <b>Central:</b><br>CEIC Hospital Clinico San Carlos Area<br>7<br>C/ Profesor Martin Lagos, s/n<br>Puerta G Planta 4 Norte<br>MADRID, 280410<br>Spain                                                                                                                                                   | Lavilla Villar, Patricia<br><br>Lozano Morillo, Fernando                                                          |
| Katsifis, Gkikas      | Naval Hospital of Athens<br>Rheumatology Clinic<br>70 Dinokratous St<br>ATHENS, Attiki 115 21<br>Greece                                                                             | <b>Central:</b><br>National Organisation of Medicines<br>(E.O.F.) and National Ethics<br>Committee (E.E.D.)<br>Mesogion 284<br>CHOLARGOS ATHENS, 15562<br>Greece                                                                                                                                       | Panagopoulos, Panagiotis<br>Rekka, Sofia                                                                          |
| Keiserman, Mauro      | LMK Sevcos Medicos S/S<br>10º andar, conj. 1008 - Boa Vista<br>Av. Carlos Gomes, 328<br>PORTO ALEGRE, Rio Grande do Sul<br>90480000<br><br>Brazil                                   | <b>Local:</b><br>Comite de Etica em Pesquisa do<br>Sistema de Saude Mae de Deus<br>Rua Grao Para, 160<br>2º andar, Menino Deus<br>PORTO ALEGRE, Rio Grande do Sul<br>90850-170<br>Brazil<br><b>Central:</b><br>Comissao Nacional de Etica em<br>Pesquisa (CONEP)                                       | Cantali, Diego Ustarroz<br>Caracciolo Picarelli, Maria Mercedes<br><br>Hickmann, Sheila<br>Streck, Aline De Souza |



|                   |                                                                                                                                                                                        |                                                                                                                                                                                                                                          |                                                                                        |
|-------------------|----------------------------------------------------------------------------------------------------------------------------------------------------------------------------------------|------------------------------------------------------------------------------------------------------------------------------------------------------------------------------------------------------------------------------------------|----------------------------------------------------------------------------------------|
|                   |                                                                                                                                                                                        | SRTVN, Quadra 701, Lote D, Edificio<br>PO 700, 3o Andar<br>Ala Norte, Via W 5 Norte, Asa Norte<br>BRASILIA/DF, 70719-040<br>Brazil                                                                                                       |                                                                                        |
| Kelly, Stephen    | Whipps Cross Univ Hospital<br>Clinical Research Unit, Barts Health<br>NHS Trust<br>Junction 9, Lower Ground Floor<br>Whipps Cross Rd, Leytonstone<br>LONDON, E11 1NR<br>United Kingdom | <b>Central:</b><br>London - Brighton and Sussex REC<br>Eastern Road<br>Audrey Emerton Building<br>BRIGHTON, BN2 0AE<br>United Kingdom                                                                                                    | Donnelly, Simon<br>Pakozdi, Angela<br>Shaikh, Maliha                                   |
| Kerzberg, Eduardo | Hospital General de Agudos<br>Jose Maria Ramos Meija<br>Gral. Urquiza 609<br>BUENOS AIRES, Ciudad Autonoma<br>de Buenos Aires C1221ADC<br>Argentina                                    | <b>Local:</b><br>Comité de Etica en Investigación /<br>Comité de Docencia e Investigación<br>del Hospital Gral. De Agudos J.M.<br>Ramos Meija<br>Gral. Urquiza 609<br>BUENOS AIRES, Ciudad Autonoma<br>de Buenos Aires 1221<br>Argentina | Castelli, Andrea<br>Maisterrena, Carlos<br>Rios, Laura Fabiana<br>Stevens, Guillermina |
| Kivitz, Alan      | Altoona Ctr Clinical Res<br>175 Meadowbrook Lane<br>DUNCANSVILLE, Pennsylvania 16635<br>United States of America                                                                       | <b>Central:</b><br>Quorum Institutional Review Board <sup>a</sup><br><br>1501 Fourth Ave<br>Suite 800<br>SEATTLE, Washington 98101<br>United States of America                                                                           | Lavelle, Lori A.<br>Murphy, Frederick T.                                               |
| Klein, Steven     | Klein & Associates, M.D., P.A.<br>Suites C&D<br>921 Seton Dr<br>CUMBERLAND, Maryland 21502-<br>1852<br>United States of America                                                        | <b>Central:</b><br>Quorum Institutional Review Board <sup>a</sup><br><br>1501 Fourth Ave<br><br>Suite 800<br>SEATTLE, Washington 98101<br>United States of America                                                                       | Gillis, Theresa M.<br>Howell, Mary P.                                                  |
| Kohen, Michael    | Millennium Research                                                                                                                                                                    | <b>Central:</b>                                                                                                                                                                                                                          | Farach, Carlos Javier                                                                  |

|                                                |                                                                                                                                   |                                                                                                                                                                                 |                                                |
|------------------------------------------------|-----------------------------------------------------------------------------------------------------------------------------------|---------------------------------------------------------------------------------------------------------------------------------------------------------------------------------|------------------------------------------------|
|                                                | Suite B2<br>1545 Hand Ave<br>ORMOND BEACH, Florida 32174<br>United States of America                                              | Quorum Institutional Review Board <sup>a</sup><br><br>1501 Fourth Ave<br>Suite 800<br>SEATTLE, Washington 98101<br>United States of America                                     |                                                |
| Kononoff, Aulikki<br><br>(Site did not enroll) | ITE Pihlajanlinna Kuopio<br>Koljonniemenkatu 2<br>KUOPIO, Pohjois-Savo 70100<br>Finland                                           | <b>Central:</b><br>Pohjois-Savon sairaanhoitopiirin<br>tutkimuseettinen toimikunta<br>Kuopion yliopostollinen sairaala<br>Puijonlaaksontie 2, PL100<br>KUOPIO, 70029<br>Finland | Nieminen, Sakari                               |
| Krause, Andreas<br><br>(Site did not enroll)   | Immanuel-Krankenhaus Berlin<br>Lindenberger Weg19 BERLIN-BUCH,<br>13125<br>Germany                                                | <b>Central:</b><br>Ethik-Kommission der Medizinischen<br>Fakultaet der Ruhr- Universität<br>Bochum<br>Gesundheitscampus 33<br>BOCHUM, Nordrhein-Westfalen<br>44801<br>Germany   | Burger, Sandra<br><br>Schmidt, Wolfgang        |
| Kristensen, Lars Erik                          | Frederiksberg Hospital<br>Artrose AmbulatorietVej 6, indgang<br>4,1Ndr. Fasanvej 57<br>FREDERIKSBERG, Hovedstaden 2000<br>Denmark | <b>Central:</b><br>Videnskabetisk Komite Region<br>Midtjylland<br>Skottenborgvej 26<br>VIBORG, 8800<br>Denmark                                                                  | Nielsen, Marie Skougård<br><br>Zobbe, Kristian |
| Kubler, Paul<br><br>(Site did not enroll)      | Royal Brisbane and Women's<br>Hospital<br>Butterfield Street, Herston<br>BRISBANE, 4029, Queensland<br>Australia                  | <b>Central:</b><br>Monash Health Human Research<br>Ethics Committee<br>Level 2, i Block,<br>Monash Medical Centre<br>246 Clayton Road<br>CLAYTON VIC, 3168<br>Australia         | Hennessey, Ashleigh<br><br>Robinson, Philip    |
| Kumar, Ramesh                                  | Ocean Rheumatology, PA                                                                                                            | <b>Central:</b>                                                                                                                                                                 | Odawo, Evelyn                                  |

|                                                                        |                                                                                                                                                     |                                                                                                                                                                                                                 |                                                              |
|------------------------------------------------------------------------|-----------------------------------------------------------------------------------------------------------------------------------------------------|-----------------------------------------------------------------------------------------------------------------------------------------------------------------------------------------------------------------|--------------------------------------------------------------|
| (Site did not enroll)                                                  | Ste 300<br>413 Lakehurst Rd<br>TOMS RIVER, New Jersey 08757<br>United States of America                                                             | Quorum Institutional Review Board <sup>a</sup><br><br>1501 Fourth Ave<br>Suite 800<br>SEATTLE, Washington 98101<br>United States of America                                                                     | Pharo, Isabella                                              |
| Kumar, Sunil                                                           | Middlemore Clinical Trials<br>Middlemore Hospital<br>100 Hospital Road<br>PAPATOETOE, Auckland 2025<br>New Zealand                                  | <b>Central:</b><br>Health and Disability Ethics<br>Committees<br>133 Molesworth St<br>WELLINGTON, Wellington 6011<br>New Zealand                                                                                | Padala, Sree Deepika<br>Turakhia, Nemi<br>Zhang, Yiling      |
| Kurylchuk, Iryna<br>(Site did not enroll)                              | Medical Center of Limited Liability<br>Company Medical Center<br>CONSILIUM MEDICAL<br>Glybochytska Str. 17<br>KYIV, Kyivska oblast 04050<br>Ukraine | <b>Local:</b><br>Local Ethics Commission of Medical<br>Center Limited Liability Company<br>Medical Center CONSILIUM<br>MEDICAL<br>17, Glybochytska Str.<br>KYIV, 04050<br>Ukraine                               | Korzchuk, Valerii O. Matiyashchuk,<br>Iryna Reshotko, Dmytro |
| Lampa, Jon<br><br>(Site did not enroll)<br>(Replaced by Catrina, Anca) | Karolinska Univ Sjukhuset<br>PO Gastro, Hud, Reuma, Tema I & I<br>Klinisk Forskningsenhet, A7:01<br>STOCKHOLM, Stockholms lan 17176<br>Sweden       | <b>Central:</b><br>Regionala etikprövningsnämnden i<br>Stockholm<br>FE 289<br>STOCKHOLM, Stockholms lan 171 77<br>Sweden<br><b>Central:</b><br>Etikprovningmyndigheten<br>Box 2110<br>UPPSALA, 750 02<br>Sweden | Altawil, Reem                                                |
| Lau, Arthur<br><br>(Site did not enroll)                               | Adachi Medicine Prof. Corp<br>501-25 Charlton Ave E<br>HAMILTON, Ontario L8N 1Y2<br>Canada                                                          | <b>Central:</b><br>Advarra<br>372 Hollandview Trail<br>Suite 300<br>AURORA, Ontario LG4 0A5<br>Canada                                                                                                           | Adachi, Jonathan D.<br>Vender, Ronald Bernard                |
| Lee, Eric                                                              | Inland Rheum Clin Trials Inc.                                                                                                                       | <b>Central:</b>                                                                                                                                                                                                 | Hou, Antony                                                  |

|                                                  |                                                                                                                         |                                                                                                                                                                    |                                                                                                                  |
|--------------------------------------------------|-------------------------------------------------------------------------------------------------------------------------|--------------------------------------------------------------------------------------------------------------------------------------------------------------------|------------------------------------------------------------------------------------------------------------------|
| (Site did not enroll)                            | 1238 East Arrow Highway<br>UPLAND, California 91786<br>United States of America                                         | Quorum Institutional Review Board <sup>a</sup><br><br>1501 Fourth Ave<br>Suite 800<br>SEATTLE, Washington 98101<br>United States of America                        | Li, Kelly Qing                                                                                                   |
| Levy, Yair                                       | Meir Medical Center<br>Department of Medicine 'E'<br>59 Tchernichovsky St<br>KFAR SABA, HaMerkaz 44281<br>Israel        | <b>Local:</b><br>Ethics Committee, Meir Medical<br>Center<br>59 Tchernichovsky Street<br>KFAR SABA, 44281<br>Israel                                                | Hepner, Yael<br>Natour, Aiman                                                                                    |
| Lidar, Merav                                     | Sheba Medical Center<br>Medicine F<br>2 Sheba Rd, Tel Hashomer<br>RAMAT GAN, HaMerkaz 5262100<br>Israel                 | <b>Local:</b><br>Ethics Committee, Sheba Medical<br>Center<br>Dereh shiba 2, Tel Hashomer<br>RAMAT GAN, 5262100<br>Israel                                          | Druyan, Amit<br>Giat, Eitan<br>Mansour, Ribhi                                                                    |
| Lindsey, Stephen M.<br><br>(Site did not enroll) | Ochsner Clinic Foundation<br>10310 The Grove Blvd<br>BATON ROUGE, Louisiana 70836-<br>6455<br>United States of America  | <b>Local:</b><br>Ochsner Clinic Foundation<br>Institutional Review Board<br><br>1514 Jefferson Highway<br>NEW ORLEANS, Louisiana 70121<br>United States of America | Alleman, Lisa Casteigne<br><br>Lawrence, David<br>Roy, Angela<br>Thiagarajan, Saravanan                          |
| Longley III, Selden                              | SIMEDHealth Research<br>Suite 17<br>4343 West Newberry Rd<br>GAINESVILLE, Florida 32607<br>United States of America     | <b>Central:</b><br>Quorum Institutional Review Board <sup>a</sup><br><br>1501 Fourth Ave<br>Suite 800<br>SEATTLE, Washington 98101<br>United States of America     | Chavous, Kathleen<br>Kush, Kelly<br>Lloyd, Thomas<br>Magenheim, Jessica<br>Rozboril, Michael                     |
| Mackay, Kirsten<br><br>(Site did not enroll)     | TORBAY AND SOUTH DEVON NHS<br>Foundation Trust<br>Torbay Hospital<br>Lowes Bridge<br>TORQUAY, TQ2 7AA<br>United Kingdom | <b>Central:</b><br>London - Brighton and Sussex REC<br>Eastern Road<br>Audrey Emerton Building<br>BRIGHTON, BN2 0AE<br>United Kingdom                              | Carbone, Michele<br>Gwynne, Catherine<br>Khalil, Amal<br>Tofi, Cristina<br>Waghmare, Surabhi<br>Winfield, Rachel |

|                                             |                                                                                                                                                                                    |                                                                                                                                                                |                                                                                                                                                                  |
|---------------------------------------------|------------------------------------------------------------------------------------------------------------------------------------------------------------------------------------|----------------------------------------------------------------------------------------------------------------------------------------------------------------|------------------------------------------------------------------------------------------------------------------------------------------------------------------|
| Mallepalli, Jyothi                          | The Arthritis & Diabetes Clinic, Inc.<br>3402 Magnolia Cove<br>MONROE, Louisiana 71203<br>United States of America                                                                 | <b>Central:</b><br>Quorum Institutional Review Board <sup>a</sup><br><br>1501 Fourth Ave<br>Suite 800<br>SEATTLE, Washington 98101<br>United States of America | Lawrence, Jereta J.<br>Musty, Praneetha<br>Midyett, Catherine Watson<br>Nicolle, Gabrielle S                                                                     |
| Matsumoto, Alan K.<br>(Site did not enroll) | The Center for Rheumatology and<br>Bone Research<br>Suite 306<br>2730 University Blvd West<br>WHEATON, Maryland 20902<br>United States of America                                  | <b>Central:</b><br>Quorum Institutional Review Board <sup>a</sup><br><br>1501 Fourth Ave<br>Suite 800<br>SEATTLE, Washington 98101<br>United States of America | Ahn, Grace E. Baraf, Herbert S.B.<br>DeMarco, Paul J.<br><br>Louie, Grant H.<br>Potter, Jeffrey A<br>Rosenberg, Robert L.<br>Siegel, Evan K<br>Thomas, Nicole S. |
| Matyska-Piekarska, Ewa                      | Centrum Reumatologii Reumatika<br>ul. Obrzeźna 5<br>WARSAW, Mazowieckie 02-691<br>Poland                                                                                           | <b>Central:</b><br>Komisja Bioetyczna przy Okręgowej<br>Izbie Lekarskiej w Krakowie<br>Ul. Krupnicza 11A<br>KRAKOW, 31-123<br>Poland                           | Jaworski, Janusz<br>Sliwiska-Stanczyk, Paula Zubrzycka-<br>Sienkiewicz, Anna Kaminska-<br>Tchorzewska, Ewa                                                       |
| Molad, Yair<br>(Site did not enroll)        | Rabin Medical Center<br>Rheumatology Department<br>39, Derekh Ze'ev Jabotinski<br>PETAH TIKVA, HaMerkaz 4941492<br>Israel                                                          | <b>Local:</b><br>Ethics Committee Rabin Medical<br>Center<br>39 Derekh Ze'ev Jabotinski<br>PETAH TIKVA, 4941492<br>Israel                                      | Dortort Lazar, Ariela<br>Edel, Yonatan<br>Oran, Shirly<br>Pokroy-Shapira, Elisheva<br>Sagy, Iftach<br>Sharabi, Amir<br>Shiber, Shachaf                           |
| Moreno, Mireia                              | Corporacio Sanitaria Parc Tauli<br>Servicio de Reumatologia<br>Edifici VII Centenari, Planta Baixa.<br>Hospital de Dia<br>C/ Parc Tauli, s/n<br>SABADELL, Barcelona 08208<br>Spain | <b>Central:</b><br>CEIC Hospital Clinico San Carlos Area<br>7<br>C/ Profesor Martin Lagos, s/n<br>Puerta G Planta 4 Norte<br>MADRID, 280410<br>Spain           | Arevalo Salaet, Marta<br>Calvet Fontova, Joan Galisteo<br>Lencastre, Carlos<br>Garcia Manrique de Lara, Maria<br>Graell Martin, Eduard                           |
| Moreta, Elvia                               | Saint Paul Rheumatology, P.A.<br>Suite 190<br>2854 Highway 55                                                                                                                      | <b>Central:</b><br>Quorum Institutional Review Board <sup>a</sup>                                                                                              | Barnes, Sandra<br>Ridley, David                                                                                                                                  |

|                       |                                                                                                                                              |                                                                                                                                                                                                                    |                                                                                                                                                                                                           |
|-----------------------|----------------------------------------------------------------------------------------------------------------------------------------------|--------------------------------------------------------------------------------------------------------------------------------------------------------------------------------------------------------------------|-----------------------------------------------------------------------------------------------------------------------------------------------------------------------------------------------------------|
|                       | EAGAN, Minnesota 55121-2156<br>United States of America                                                                                      | 1501 Fourth Ave<br>Suite 800<br>SEATTLE, Washington 98101<br>United States of America                                                                                                                              |                                                                                                                                                                                                           |
| Moulatzikos, Christos | Orebro Universitetssjukhuset<br>Avdelningen för Kliniska Prövningar<br>S-huset, Södra Grev Rosengatan<br>OREBRO, Orebro lan 701 85<br>Sweden | <b>Central:</b><br>Regionala etikprövningsnämnden i<br>Stockholm<br>FE 289<br>STOCKHOLM, Stockholms lan 171 77<br>Sweden<br><b>Central:</b><br>Etikprovningensmyndigheten<br>Box 2110<br>UPPSALA, 750 02<br>Sweden | Magnusson Bucher, Sara<br>Nordstrom, Johanna<br>Salomonsson, Per                                                                                                                                          |
| Mueller, Eric         | Arthritis Northwest, PLLC<br>Suite 6080/7030<br>105 West 8th Ave<br>SPOKANE, Washington 99204<br>United States of America                    | <b>Central:</b><br>Quorum Institutional Review Board <sup>a</sup><br><br>1501 Fourth Ave<br>Suite 800<br>SEATTLE, Washington 98101<br>United States of America                                                     | Burgess, Bonnie<br>Butler, Jeffrey B.<br>Cone, Terri<br>Craig, Gary L.<br>Kenney, Howard<br>LaSalle, Sean<br>Mantello, Flori<br>Petersen, Erica<br>Raschko, Dale<br>Webster, Diana<br>Wright, Christopher |
| Muller, Raili         | MediTrials<br><br>Mõisavahe 34c<br>TARTU, Tartumaa 50708 Estonia                                                                             | <b>Central:</b><br>Research Ethics Committee of the<br>National Institute for Health<br>Development<br>Hiiu 42<br>TALLINN, Harjumaa 11619<br>Estonia                                                               | Kull, Triin<br><br>Tender, Mare Valner, Annika                                                                                                                                                            |
| Myerson, Gary         | Arthritis and Rheumatology of<br>Georgia, P.C.<br>Suite 220<br>980 Jonhson Ferry Rd NE<br>ATLANTA, Georgia 30342                             | <b>Central:</b><br>Quorum Institutional Review Board <sup>a</sup><br><br>1501 Fourth Ave<br>Suite 800                                                                                                              | Sutej, Paul G. Tanasa, Paula A.                                                                                                                                                                           |

|                                          |                                                                                                                                     |                                                                                                                                                                                                                                                                                  |                                                                                                                                         |
|------------------------------------------|-------------------------------------------------------------------------------------------------------------------------------------|----------------------------------------------------------------------------------------------------------------------------------------------------------------------------------------------------------------------------------------------------------------------------------|-----------------------------------------------------------------------------------------------------------------------------------------|
|                                          | United States of America                                                                                                            | SEATTLE, Washington 98101<br>United States of America                                                                                                                                                                                                                            |                                                                                                                                         |
| Ng, Jennifer<br>(Site did not enroll)    | Griffith University<br>Gold Coast Campus<br>SOUTHPORT, Queensland 4215<br>Australia                                                 | <b>Central:</b><br>Bellberry Limited Human Research<br>Ethics Committee<br>123 Glen Osmond Road<br>EASTWOOD, South Australia 5063<br>Australia<br><b>Local:</b><br>Griffiths University Research Office<br>Nathan Campus<br>Griffiths University<br>QUEENSLAND 4222<br>Australia | Tracey, Gerald                                                                                                                          |
| Nicholls, David<br>(Site did not enroll) | Rheumatology Research Unit<br>9-10 Denna St<br>MAROOCHYDORE, Queensland 4558<br>Australia                                           | <b>Central:</b><br>Bellberry Limited<br>129 Glen Osmond Road<br>EASTWOOD, South Australia 5063<br>Australia                                                                                                                                                                      | Johnson, Frances<br>Nash, Peter<br>Thackwray, Susan                                                                                     |
| Oelke, Kurt                              | Rheumatic Disease Center, LLP<br>7080 N Port Washington Rd<br>GLENDALE, Wisconsin 53217<br>United States of America                 | <b>Central:</b><br>Quorum Institutional Review Board <sup>a</sup><br><br>1501 Fourth Ave<br>Suite 800<br>SEATTLE, Washington 98101<br>United States of America                                                                                                                   | Albert, John A.<br>Bergquist, Steven Robert<br>Cronin, Mary<br>Hameed, Suhail<br>Kushi, Jonathan<br>Pasha, Farrukh<br>Zastrow, Jennifer |
| Ostor, Andrew                            | Emeritus Research<br>Level 2, 1180 Toorak Rd, Camberwell<br>CAMBERWELL, Victoria 3124<br><br>Australia                              | <b>Central:</b><br>Bellberry Limited<br>123 Glen Osmond Road<br>EASTWOOD, South Australia 5063<br><br>Australia                                                                                                                                                                  | Anderson, Ross<br>De Silva, Thilinie<br>Hall, Stephen<br>McKay, Nicole<br>Murdoch, Louise<br>Smith, Deon                                |
| Pang, Shirley                            | St. Joseph Heritage Healthcare<br>Suite 25000<br>2141 N Harbor Blvd<br>FULLERTON, California 92835-3825<br>United States of America | <b>Central:</b><br>Quorum Institutional Review Board <sup>a</sup><br><br>1501 Fourth Ave<br>Suite 800<br>SEATTLE, Washington 98101                                                                                                                                               | Valle, Natalie P.                                                                                                                       |

|                                            |                                                                                                                |                                                                                                                                                                                                                                                                                                      |                                                      |
|--------------------------------------------|----------------------------------------------------------------------------------------------------------------|------------------------------------------------------------------------------------------------------------------------------------------------------------------------------------------------------------------------------------------------------------------------------------------------------|------------------------------------------------------|
|                                            |                                                                                                                | United States of America                                                                                                                                                                                                                                                                             |                                                      |
| Papp, Kim                                  | K. Papp Clinical Research<br>135 Union St East<br>WATERLOO, Ontario N2J 1C4<br>Canada                          | <b>Local:</b><br>Research Review Board Inc<br>19-13085 Yonge Street<br>Suite 203<br>RICHMOND HILL, Ontario L4E 0K2<br>Canada                                                                                                                                                                         | Cy, Ajith<br>Richardson, Donald B.<br>Yeung, Jensen  |
| Perez Alamino, Rodolfo                     | CIMER<br><br>San Lorenzo 1241<br>SAN MIGUEL DE TUCUMAN,<br>Tucuman T4000CBC Argentina                          | <b>Local:</b><br>Comite Independiente de Etica para<br>Ensayos en farmacologia Clinica<br>Fundacion de Estudios<br>Farmacologicos y de<br>Medicamentos, Prof. Luis M. Zieher,<br>FEFyM<br>Pte. J.E. Uriburu 774, 1st Floor<br>BUENOS AIRES, Ciudad Autonoma<br>de Buenos Aires C1027AAP<br>Argentina | Colombres, Francisco<br><br>Marcaida, Priscila Maria |
| Pickrell, Paul                             | Tekton Research, Inc.<br>Suite 110<br>4534 W Gate Blvd<br>AUSTIN, Texas 78745-1485<br>United States of America | <b>Central:</b><br>Advarra<br>6940 Columbia Gateway Drive<br>Suite 110<br>COLUMBIA, Maryland 21046<br>United States of America                                                                                                                                                                       | Mott, Stefanie<br>Pampe, E. David                    |
| Pirila, Laura<br><br>(Site did not enroll) | Turku University Hospital<br>Kiinamylynkatu 4-8<br>TURKU, FI-20520<br>Finlan                                   | <b>Central:</b><br>Pohjois-Savon sairaanhoitopiirin<br>tutkimuseettinen toimikunta<br>Kuopion yliopistollinen sairaala<br>Puijonlaaksontie 2, PL 100<br>KYS, 70029<br>Finland                                                                                                                        | Kortelainen, Saara<br><br>Paltta, Johanna            |
| Potts, Jennifer                            | Greenacres Hospital<br>Suite 224<br>Rochelle Rd<br>PORT ELIZABETH, Eastern Cape 6045<br>South Africa           | <b>Central:</b><br>Pharma Ethics Pty Ltd<br>123 Amcor Road, Lyttelton Manor<br>PRETORIA, 0002<br>South Africa                                                                                                                                                                                        | Podgorski, Gracjan Piotr                             |



|                        |                                                                                                                        |                                                                                                                                                                |                                                                                                                                                                                                                                       |
|------------------------|------------------------------------------------------------------------------------------------------------------------|----------------------------------------------------------------------------------------------------------------------------------------------------------------|---------------------------------------------------------------------------------------------------------------------------------------------------------------------------------------------------------------------------------------|
| Przybylowska, Krystyna | Centrum Badań Klinicznych Pi-House<br>sp. z.o.o.<br>ul. Na Zaspe 3 GDANSK, 80-546<br>Poland                            | <b>Central:</b><br>Komisja Bioetyczna przy Okregowej<br>Izbie Lekarskiej w Krakowie<br>Ul. Krupnicza 11A<br>KRAKOW, 31-123<br>Poland                           | Czuszynska, Zenobia Imko-Walczuk,<br>Beata Okuniewska, Aleksandra                                                                                                                                                                     |
| Quagliato, Norberto    | Instituto CAICI SRL<br>Mendoza 2612<br>ROSARIO, Santa Fe CP2000<br>Argentina                                           | <b>Local:</b><br>Comite de Etica CAICI-CIAP<br>Rodriguez 1198<br>ROSARIO, Santa Fe 2000<br>Argentina                                                           | Conti, Silvana Mariela<br>Creman, Juan Carlos<br>Siri, Daniel Alberto                                                                                                                                                                 |
| Racewicz, Artur        | Osteo-Medic<br>s.c. A. Racewicz, J. Supronik ul.<br>Wiejska 81 BIALYSTOK, 15-351<br>Poland                             | <b>Central:</b><br>Komisja Bioetyczna przy Okregowej<br>Izbie Lekarskiej w Krakowie<br>Ul. Krupnicza 11A KRAKOW, 31-123<br>Poland                              | Denisiuk, Helena<br>Golaszewska, Dorota Kalinko, Sylwia<br>Raczynska, Sylwia Supronik, Jerzy                                                                                                                                          |
| Ramani, Priya          | ForCare Clinical Research<br>15416 N Florida Ave<br>TAMPA, Florida 33613<br>United States of America                   | <b>Central:</b><br>Quorum Institutional Review Board <sup>a</sup><br><br>1501 Fourth Ave<br>Suite 800<br>SEATTLE, Washington 98101<br>United States of America | Aaron, Casey<br>Alvarez, Emily Lynn<br>Bogle, Tanya R.<br>Cutting, Stacey<br>Encarnacion, Frances<br>Forman, Seth Benjamin<br>Germain, Bernard F.<br>Jones, Felicia Shonte<br>Moye, Jennifer Lynn<br>Roberts, Amanda<br>Sosa, John P. |
| Raussi, Eve-Kai        | North Estonia Medical Centre<br><br>Department of Rheumatology<br>J. Sutiste str 19<br>TALLINN, Harjumaa 13419 Estonia | <b>Central:</b><br>Research Ethics Committee of the<br>National Institute for Health<br>Development<br>Hiiu 42<br>TALLINN, Harjumaa 11619<br>Estonia           | Kiseleva, Natalja<br><br>Ojassalu, Ene Parsik, Eevi Tuvik, Pila                                                                                                                                                                       |
| Rehman, Qaiser         | Rheumatology Clinic of Houston<br>Suite 240<br>11307 FM 1960 West<br>HOUSTON, Texas 77065                              | <b>Central:</b><br>Quorum Institutional Review Board <sup>a</sup><br><br>1501 Fourth Ave                                                                       | Irfan, Muhammad                                                                                                                                                                                                                       |

|                                               |                                                                                                                                                              |                                                                                                                                                                                                                 |                                                                                       |
|-----------------------------------------------|--------------------------------------------------------------------------------------------------------------------------------------------------------------|-----------------------------------------------------------------------------------------------------------------------------------------------------------------------------------------------------------------|---------------------------------------------------------------------------------------|
|                                               | United States of America                                                                                                                                     | Suite 800<br>SEATTLE, Washington 98101<br>United States of America                                                                                                                                              |                                                                                       |
| Reitblat, Tatiana                             | Barzilai Medical Center<br>Rheumatology Unit<br>2 Hahistadrout St.<br>ASHKELON, 78278<br>Israel                                                              | <b>Local:</b><br>Ethics Committee, Barzilai Medical<br>Center<br>2 Hahistadrut St.<br>ASHKELON, 78278<br>Israel                                                                                                 | Grisko, Olga<br>Reifman, Galina                                                       |
| Rigby, William                                | Dartmouth-Hitchcock Medical<br>Center<br>Section of Rheumatology 1 Medical<br>Center Dr<br>LEBANON, New Hampshire 03756-<br>1000<br>United States of America | <b>Local:</b><br>Dartmouth-Hitchcock Health Human<br>Research Protection Program<br>One Medical Center Drive<br>LEBANON, New Hampshire 03756<br>United States of America                                        | Mathew, Stephanie D.<br><br>Mecchalla, John N. Orzechowski,<br>Nicole M. Pompa, Scott |
| Rizk, Milad<br>(Site did not enroll)          | Reumatologkliniken<br>Västmanlands sjukhus Västerås<br>VÄSTERÅS, Vastmanlands lan 721 89<br>Sweden                                                           | <b>Central:</b><br>Regionala etikprövningsnämnden i<br>Stockholm<br>FE 289<br>STOCKHOLM, Stockholms lan 171 77<br>Sweden<br><b>Central:</b><br>Etikprovningmyndigheten<br>Box 2110<br>UPPSALA, 750 02<br>Sweden | Markros, Fredrik                                                                      |
| Roberts, Lynden<br>(Replaced by Antony, Anna) | Monash Health<br>246 Clayton Rd<br>CLAYTON, Victoria 3168<br>Australia                                                                                       | <b>Central:</b><br>Monash Health Human Research<br>Ethics Committee<br>246 Clayton Road<br>MELBOURNE, Victoria 3168<br>Australia                                                                                | Antony, Anna<br>Ayoub, Sally                                                          |
| Rojek-Margas, Bozena                          | Malopolskie Centrum Kliniczne<br>ul. Balicka 12a/5b KRAKOW, 30-149<br>Poland                                                                                 | <b>Central:</b><br>Komisja Bioetyczna przy Okregowej<br>Izbie Lekarskiej w Krakowie<br>Ul. Krupnicza 11A                                                                                                        | Dziedzic, Paula<br>Grabowska, Dorota Stozek,<br>Katarzyna Zimmer-Satora, Ewa          |

|                                              |                                                                                                                                                                   |                                                                                                                                                                |                                                                                                                          |
|----------------------------------------------|-------------------------------------------------------------------------------------------------------------------------------------------------------------------|----------------------------------------------------------------------------------------------------------------------------------------------------------------|--------------------------------------------------------------------------------------------------------------------------|
|                                              |                                                                                                                                                                   | KRAKOW, 31-123<br>Poland                                                                                                                                       |                                                                                                                          |
| Rojkovich, Bernadette                        | Betegapolo Irgalmas Rend<br>Budai Irgalmasrendi Korhaz<br>Reumatologiai Osztaly<br>Arpad fejedelem utja 7<br>BUDAPEST, Budapest 1023<br>Hungary                   | <b>Central:</b><br>Egészségügyi Tudományok Tanács<br>Klinikai Farmakologia Bizottság<br>Alkotmány utca 25<br>BUDAPEST, Budapest 1025<br>Hungary                | Fülöp, Angéla<br>Gati, Tamas<br>Imre, Katalin<br>Mészáros, Györgyi                                                       |
| Roman Ivorra, Jose                           | Hospital Universitario La Fe<br>Servicio Reumatologia<br>6a planta. torre B<br>Avda F. Abril Martorell 106<br>VALENCIA, 46026<br>Spain                            | <b>Central:</b><br>CEIm Hospital Clinico San Carlos<br>Area 7<br>C/ Profesor Martin Lagos, s/n<br>Puerta G Planta 4 Norte<br>MADRID, 28040<br>Spain            | Alcaniz Escandell, Cristina Patricia<br>Ortiz Sanjuan, Francisco Miguel<br>Vicéns Bernabeu, Elvira                       |
| Saadeh, Constantine<br>(Site did not enroll) | Amarillo Ctr for Clin Research<br>6842 Plum Creek Dr<br>AMARILLO, Texas 79124<br>United States of America                                                         | <b>Central:</b><br>Quorum Institutional Review Board <sup>a</sup><br><br>1501 Fourth Ave<br>Suite 800<br>SEATTLE, Washington 98101<br>United States of America | Davey-Ranasinghe, Nicole<br><br>Griffith, Melissa                                                                        |
| Saikali, Wassim                              | Rheumatology and Pulmonary Clinic<br>421 Carriage Dr<br>BECKLEY, West Virginia 25801-2805<br>United States of America                                             | <b>Central:</b><br>Quorum Institutional Review Board <sup>a</sup><br><br>1501 Fourth Ave<br>Suite 800<br>SEATTLE, Washington 98101<br>United States of America | Boustani, Maria                                                                                                          |
| Salvarani, Carlo<br>(Site did not enroll)    | Azienda Ospedaliero-Universitaria<br>Policlinico di Modena<br>Struttura Complessa di<br>Reumatologia<br>Via del Pozzo 71<br>MODENA, Emilia-Romagna 41124<br>Italy | <b>Local:</b><br>Comitato Etico Area Vasta Emilia<br>Nord<br><br>Via del Pozzo, 71<br>MODENA, Emilia-Romagna 41124<br>Italy                                    | Citriniti, Giorgia Lumetti, Federica<br>Manfredi, Andreina<br><br>Sandri, Gilda<br>Sebastiani, Marco<br>Spinella, Amelia |
| Sew Hoy, Marina                              | CGM Research Trust                                                                                                                                                | <b>Central:</b>                                                                                                                                                | Gilchrist, Nigel                                                                                                         |

|                                               |                                                                                                                                                               |                                                                                                                                                                                                                              |                                                                                                                        |
|-----------------------------------------------|---------------------------------------------------------------------------------------------------------------------------------------------------------------|------------------------------------------------------------------------------------------------------------------------------------------------------------------------------------------------------------------------------|------------------------------------------------------------------------------------------------------------------------|
|                                               | Burwood Hospital<br>300 Burwood Road<br>BURWOOD CHRISTCHURCH, 8083<br>New Zealand                                                                             | Health and Disability Ethics<br>Committees<br>133 Molesworth St<br>WELLINGTON, Wellington 6011<br>New Zealand                                                                                                                |                                                                                                                        |
| Sidiropoulos, Prodromos                       | University General Hospital of<br>Heraklion P.A.G.N.I<br>Internal Medicine/Rheumatology<br>Voutes<br>HERAKLION, 71110<br>Greece                               | <b>Central:</b><br>National Organisation of Medicines<br>(E.O.F.) and National Ethics<br>Committee (E.E.D.)<br>Mesogion 284<br>CHOLARGOS ATHENS, 15562<br>Greece                                                             | Adamichou, Christina Avgoustidis,<br>Nestor Bertias, Georgios Kougkas,<br>Nikolaos Repa, Argiro Tzanakakis,<br>Michail |
| Singhal, Atul                                 | SW Rheumatology Res. LLC<br>Suite 200<br>1600 Republic Pkwy<br>MESQUITE, Texas 75150<br>United States of America                                              | <b>Central:</b><br>Quorum Institutional Review Board <sup>a</sup><br><br>1501 Fourth Ave<br>Suite 800<br>SEATTLE, Washington 98101<br>United States of America                                                               | Campbell, Carmen Marie<br>Patel-Banker, Megha<br>Ty-Arias, Mei-An Tonette                                              |
| Soriano, Enrique<br><br>(Site did not enroll) | Hospital Italiano de Buenos Aires<br>Tte Gral Juan D. Peron 4190<br>BUENOS AIRES, Ciudad Autonoma<br>de Buenos Aires C1199ABB<br>Argentina                    | <b>Local:</b><br>Comite de Etica de Protocolos de<br>Investigation (CEPEI) del<br>Hospital Italiano de Buenos Aires<br>Tte Gral Juan D. Peron 4190<br>BUENOS AIRES, Ciudad Autonoma<br>de Buenos Aires C1199AAB<br>Argentina | Brom, Martín<br><br>Garcia, Maria Victoria Sabelli, Mirtha                                                             |
| Sousa, Elsa                                   | Centro Hospitalar de Lisboa Norte<br>Serviço de Reumatologia<br>Piso 7, Elevador 7<br>Avenida Professor Egas Moniz<br>LISBON, Lisboa 1649-035<br><br>Portugal | <b>Central:</b><br>CEIC - Comissão de Ética para a<br>Investigação Clínica<br>Parque da Saude de Lisboa, Av. do<br>Brasil, 53 - Pav. 17-A<br>LISBON, Lisboa 1749-004<br>Portugal                                             | Barreira, Sofia<br>Khmelinskii, Nikita<br>Machado, Ana Rita<br>Teixeira, Rui<br>Tenazinha, Catarina                    |
| Spargo, Catherine                             | Arthritis Clinical Research Trials<br>Room 201, 2nd floor<br>The Park, Park Rd<br>PINELANDS, Cape Town 7405                                                   | <b>Central:</b><br>Pharma Ethics Pty Ltd<br>123 Amcor Road, Lyttelton Manor<br>PRETORIA, 0157                                                                                                                                | Bhorat, Rehana Bibi<br>van Rensburg, Mark                                                                              |

|                                                  |                                                                                                                                                                                                                                                                         |                                                                                                                                                                            |                                                                                                       |
|--------------------------------------------------|-------------------------------------------------------------------------------------------------------------------------------------------------------------------------------------------------------------------------------------------------------------------------|----------------------------------------------------------------------------------------------------------------------------------------------------------------------------|-------------------------------------------------------------------------------------------------------|
|                                                  | South Africa                                                                                                                                                                                                                                                            | South Africa                                                                                                                                                               |                                                                                                       |
| Spooenberg, Anneke<br>(Site did not enroll)      | Universitair Medisch Centrum<br>Groningen<br>Hanzeplein 1<br>GRONINGEN, 9713 GZ<br>Netherlands                                                                                                                                                                          | <b>Central:</b><br>METC Erasmus MC<br>Postbus 2040<br>ROTTERDAM, Zuid-Holland 3000 CA<br>Netherlands                                                                       | Jager, Nynke                                                                                          |
| Sriranganathan, Melonie<br>(Site did not enroll) | Changi General Hospital<br>2 Simei Street 3<br>SINGAPORE, South East 529889<br>Singapore                                                                                                                                                                                | <b>Central:</b><br>Singhealth Centralised Institutional<br>Review Board (CIRB)<br>#06-08 Tower 3 Connection One<br>168 Jalan bukit Merah<br>SINGAPORE, 150168<br>Singapore | Cheng, Yew Kuang<br>Leong, Joanna Wai Yee<br>Santosa, Anindita<br>Soe, Wint Wah<br>Vasudevan, Archana |
| Stanislavchuk, Mykola<br>(Site did not enroll)   | Vinnytsia Regional Clinical Hospital<br>n.a. M.I.Pyrogov, Rheumatology<br>Department Vinnytsia National<br>Medical University<br>n.a.<br>M.I. Pyrogov, Chair of Internal<br>Medicine #1<br>46, Pyrogoва Str., Vinnytsia<br>VINNYTSIA, Vinnytska oblast 21018<br>Ukraine | <b>Local:</b><br>Local Ethics Commission of Vinnytsia<br>Regional Clinical Hospital n.a.<br>M.I.Pyrogov<br>46, Pyrohova Street<br>VINNYTSIA, 21018<br>Ukraine              | Ostapchuk, Olena Shkolina, Nataliia<br>V.                                                             |
| Tarr, Gareth                                     | Winelands Medical Research Ctr<br>C/O Saffraan and Rokewoods Ave,<br>Suite G08<br>Winelands MediClinic Hospital<br>STELLENBOSCH, 7600<br>South Africa                                                                                                                   | <b>Central:</b><br>Pharma Ethics<br>123 Amcor Road, Lyttelton Manor<br>CENTURION, Gauteng 0157<br>South Africa                                                             | Botha, Stella<br>Bouwer, Francois<br>Cooper, Robert<br>Esterhuyse, Frieda<br>Howard, Jonelle          |
| Thai, Christine                                  | Care Access Research<br>Suite 320<br>19582 Beach Blvd<br>HUNTINGTON BEACH, California<br>92648<br>United States of America                                                                                                                                              | <b>Central:</b><br>Quorum Institutional Review Board <sup>a</sup><br>1501 Fourth Ave<br>Suite 800<br>SEATTLE, Washington 98101<br>United States of America                 | Majlessi, A Lisa                                                                                      |
| Thomson, Glen                                    | CIADS Research Co Ltd                                                                                                                                                                                                                                                   | <b>Central:</b>                                                                                                                                                            | Thomson, Brent Ross James                                                                             |

|                                                     |                                                                                                                                         |                                                                                                                                                                                               |                                                                                   |
|-----------------------------------------------------|-----------------------------------------------------------------------------------------------------------------------------------------|-----------------------------------------------------------------------------------------------------------------------------------------------------------------------------------------------|-----------------------------------------------------------------------------------|
|                                                     | 1835 Corydon Ave<br>WINNIPEG, Manitoba R3N 0K6<br>Canada                                                                                | Advarra<br>372 Hollandview Trail<br>Suite 300<br>AURORA, Ontario LG4 0A5<br>Canada                                                                                                            |                                                                                   |
| Trapp, Robert                                       | Springfield Clinic<br>Clinical Research<br>900 North First Street, Room 1104<br>SPRINGFIELD, Illinois 62702<br>United States of America | <b>Central:</b><br>Quorum Institutional Review Board <sup>a</sup><br><br>1501 Fourth Ave<br>Suite 800<br>SEATTLE, Washington 98101<br>United States of America                                | Guthrie, Jason<br>Horvath, Jeffrey<br>Pick, Michael<br>Stern, Mark                |
| Truchetet, Marie-Elise<br><br>(Site did not enroll) | CHU Bordeaux-Hopital Pellegrin<br>Service de Rhumatologie<br>1 Place Amelie Raba-Leon<br>BORDEAUX, Gironde 33076<br>France              | <b>Central:</b><br>Sud Mediterranee V<br>4 avenue Reine Victoria - CS 91179<br>Hopital de Cimiez - Pavillon Victoria -<br>Rez-de-Chaussee<br>NICE CEDEX 1, Alpes-Maritimes<br>06003<br>France | Mehsen, Nadia<br>Poursac, Nicolas<br>Richez, Christophe<br>Schaefferbeke, Thierry |
| True, David<br><br>(Site did not enroll)            | Clinvest Research LLC<br>Suite C100<br>4350 S National Ave<br>SPRINGFIELD, Missouri 65810-2607<br>United States of America              | <b>Central:</b><br>Quorum Institutional Review Board <sup>a</sup><br><br>1501 Fourth Ave<br>Suite 800<br>SEATTLE, Washington 98101<br>United States of America                                | Fenske, Matthew<br>Matthews, Carol<br>Thomas, Apryl                               |
| Valenzuela, Guillermo                               | IRIS Research and Development, LLC<br>Ste B<br>140 SW 84th Ave<br>PLANTATION, Florida 33324<br>United States of America                 | <b>Central:</b><br>Quorum Institutional Review Board <sup>a</sup><br><br>1501 Fourth Ave<br>Suite 800<br>SEATTLE, Washington 98101<br>United States of America                                | Colon-Soto, Marilu<br>Esparza, Geisel<br>Zermeno, Sheila                          |
| Van den Bosch, Filip                                | UZ Gent<br>Corneel Heymanslaan 10<br>GENT, Oost-Vlaanderen 9000<br>Belgium                                                              | <b>Central:</b><br>Commissie voor Medische Ethiek<br>Universitair Ziekenhuis Gent<br>C. Heymanslaan 10                                                                                        | Carron, Philippe<br>Debusschere, Claire<br>Depicker, Anais                        |

|                                       |                                                                                                                                         |                                                                                                                                                          |                                                                                                                |
|---------------------------------------|-----------------------------------------------------------------------------------------------------------------------------------------|----------------------------------------------------------------------------------------------------------------------------------------------------------|----------------------------------------------------------------------------------------------------------------|
|                                       |                                                                                                                                         | GENT, Oost-Vlaanderen 9000<br>Belgium                                                                                                                    |                                                                                                                |
| Vanhoof, Johan                        | ReumaClinic<br>Jaarbeurslaan 21b22,<br>GENK, Limburg 3600<br>Belgium                                                                    | <b>Central:</b><br>Commissie voor Medische Ethiek<br>Universitair Ziekenhuis Gent<br>C. Heymanslaan 10<br>GENT, Oost-Vlaanderen 9000<br>Belgium          | Berghs, Hubert<br>Coppens, Marleen<br>Geusens, Piet<br>Sileghem, Anna<br>Volders, Pascale                      |
| Vasandani, Jitendra                   | West Texas Clinical Research<br>Suite 2C<br>3809 22nd St<br>LUBBOCK, Texas 79410<br>United States of America                            | <b>Central:</b><br>Advarra<br>6940 Columbia Gateway Drive<br>Suite 110<br>COLUMBIA, Maryland 21046<br>United States of America                           | Caravey, Jennifer<br>Parrish, Brenda<br>Sullivan, Heather<br>Wheeler, Lauren                                   |
| Veldi, Tiina                          | East Tallinn Central Hospital<br><br>Parnu mnt104<br>TALLINN, Harjumaa 11312 Estonia                                                    | <b>Central:</b><br>Research Ethics Committee of the<br>National Institute for the Health<br>Development<br>Hiiu 42<br>TALLINN, Harjumaa 11619<br>Estonia | Otsa, Kati<br><br>Pail, Margus Savi, Triin Uprus, Maria                                                        |
| Vila-Rivera, Karina                   | GCM Medical Group PSC<br>Urb Floral Park<br>Calle Jose Marti #62<br>SAN JUAN, 00917<br>Puerto Rico                                      | <b>Central:</b><br>Advarra<br>6940 Columbia Gateway Drive<br>Suite 110<br>COLUMBIA, Maryland 21046<br>United States of America                           | Cortes-Maisonet, Gregorio A.<br>Reyez-Blanco, Genesis J.<br>Rivera-Rivera, Carla M.                            |
| Walker, Nancy                         | Clinical Research Ctr Reading<br>2760 Century Blvd<br>WYOMISSING, Pennsylvania 19610<br>United States of America                        | <b>Central:</b><br>Advarra<br>6940 Columbia Gateway Drive<br>Suite 110<br>COLUMBIA, Maryland 21046<br>United States of America                           | Borofsky, Michael<br>Griffin, Robert M.<br>Keefe, Amy<br>Kuhns, Cheryl A.<br>Mehta, Saurin<br>Wagner, Linda L. |
| Wells, Alvin<br>(Site did not enroll) | Aurora Rheumatology and<br>Immunotherapy Center 4225 W<br>Oakwood Park Ct<br>FRANKLIN, Wisconsin 53132-8131<br>United States of America | <b>Central:</b><br>Quorum Institutional Review Board <sup>a</sup><br><br>1501 Fourth Ave<br>Suite 800                                                    | Bury, Rachel<br><br>McPolin, Catherine<br>Ohlrogge, Brittany                                                   |

|                                               |                                                                                                                                         |                                                                                                                                                                                                                                                                                                                                                                               |                                                                                                                 |
|-----------------------------------------------|-----------------------------------------------------------------------------------------------------------------------------------------|-------------------------------------------------------------------------------------------------------------------------------------------------------------------------------------------------------------------------------------------------------------------------------------------------------------------------------------------------------------------------------|-----------------------------------------------------------------------------------------------------------------|
|                                               |                                                                                                                                         | SEATTLE, Washington 98101<br>United States of America                                                                                                                                                                                                                                                                                                                         | Oldenberg, Justine<br>Sell, Amanda<br>Yanny, Lynda                                                              |
| White, Douglas                                | Waikato Hospital<br>Ryburn Building<br>Cnr Pembroke and Selwyn Street<br>HAMILTON, 3204<br>New Zealand                                  | <b>Central:</b><br>Health and Disability Ethics<br>Committees<br>133 Molesworth St<br>WELLINGTON, Thorndon 6011<br>New Zealand                                                                                                                                                                                                                                                | Arad, Uri<br><br>Doube, Alan                                                                                    |
| Ximenes, Antonio<br><br>(Site did not enroll) | CIP - Centro Internacional de<br>Pesquisa<br>Setor Oeste<br>Rua 9B, 129<br>GOIANIA, 74110-120<br>Brazil                                 | <b>Local:</b><br>Comitê de Ética em Pesquisa do<br>Hospital Alberto Rassi - CEPHGG<br>Av. Anhanguera, 6479<br>Setor Oeste<br>GOIÂNIA, Goiás 74110-010<br>Brazil<br><b>Central:</b><br>Comissao Nacional de Etica em<br>Pesquisa (CONEP)<br>SRTVN, Quadra 701, Lote D, Edificio<br>PO 700, 3o Andar<br>Ala Norte, Via W 5 Norte, Asa Norte<br>BRASILIA/DF, 70719-040<br>Brazil | Linhares, Nicolle Diniz<br><br>de Oliveira, Fabia Mara Goncalves<br>Prates<br><br>Navarrete Fernandez, Rafael   |
| Zagar, Karen                                  | Arthritis Center, Inc.<br>Suite 2 and 3<br>32615 US Highway 19 North<br>PALM HARBOR, Florida 34684<br>United States of America          | <b>Central:</b><br>Advarra<br>6940 Columbia Gateway Drive<br>Suite 110<br>COLUMBIA, Maryland 21046<br>United States of America                                                                                                                                                                                                                                                | Bockelkamp, Amy<br>Hanson, Tricia<br>McNeil, Anita<br>Murali, Priyanka<br>Nagibina, Tatiana<br>Pfeiffer, Ginger |
| Zahabi-Unwala, Fehmida                        | Trinity Universal Research<br>Associates, Inc.<br>Suite 706<br>4105 Spring Creek Pkwy<br>PLANO, Texas 75024<br>United States of America | <b>Central:</b><br>Quorum Institutional Review Board <sup>a</sup><br>1501 Fourth Ave<br>Suite 800<br>SEATTLE, Washington 98101<br>United States of America                                                                                                                                                                                                                    | Apte, Smriti<br><br>Joseph, Rimla A. Landon, Andrea                                                             |

IEC/IRB, Independent Ethics Committee/Institutional Review Board.
